# Supplementary material for: Ex Vivo Functional Benchmarking of Hyaluronan-Based Osteoarthritis Viscosupplement Products: Comprehensive Assessment of Rheological, Lubricative, Adhesive, and Stability Attributes
Source: MDPI journal article supplement (doi:10.3390/gels9100808), 2023-10-09
Supplement: s1 [file s1]

---

## Supplementary Materials:

# Ex Vivo Functional Benchmarking of Hyaluronan-Based Osteoarthritis Viscosupplement Products: Comprehensive Assessment of Rheological, Lubricative, Adhesive, and Stability Attributes

Alexandre Porcello, Farid Hadjab, Maryam Ajouaou, Virginie Philippe, Robin Martin, Philippe Abdel-Sayed, Nathalie Hirt-Burri, Corinne Scaletta, Wassim Raffoul, Lee Ann Applegate, Eric Allémann, Olivier Jordan and Alexis Laurent

### 1. Supplementary Figures

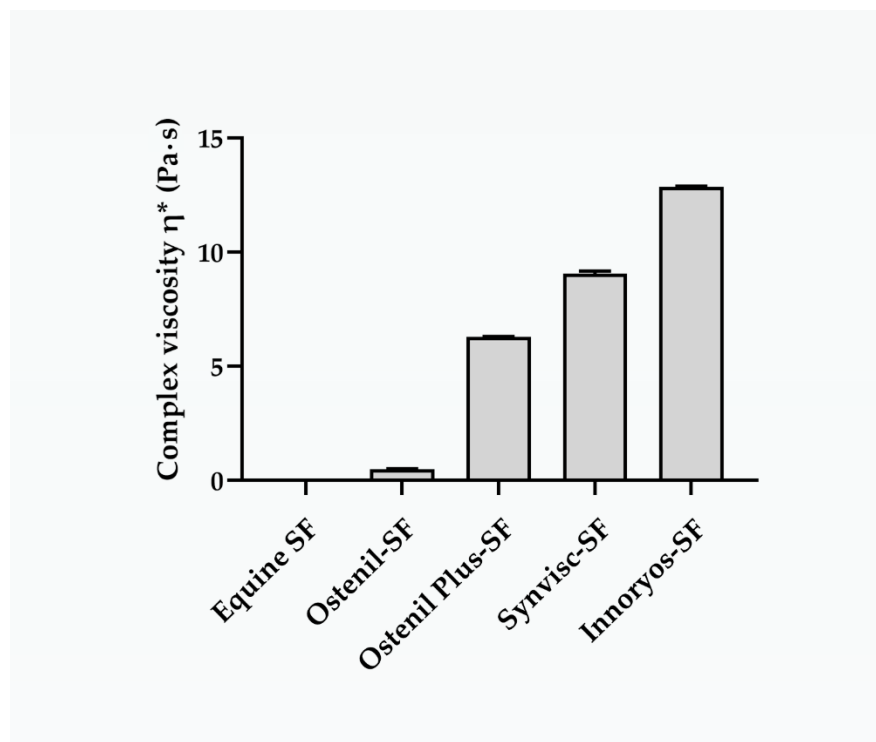

**Figure S1.** Results of ex vivo oscillatory rheology measurements for the four considered commercial hydrogel preparations, with comparative quantitative determination of the  $\eta^*$  complex viscosity, in relation with the data presented in Figure 1. The samples were prepared by combination of the hydrogel with equal volumes of fresh equine SF and were analyzed at 22 °C with a frequency of 0.5 Hz, simulating a normal walking condition. Measurements were performed in triplicate and standard deviations were reported as error bars around mean values. All inter-group differences were found to be extremely statistically significant ( $p$ -value <0.0001). Detailed results of the statistical analysis are presented in Table S1. Pa·s, Pascal seconds; SF, synovial fluid.

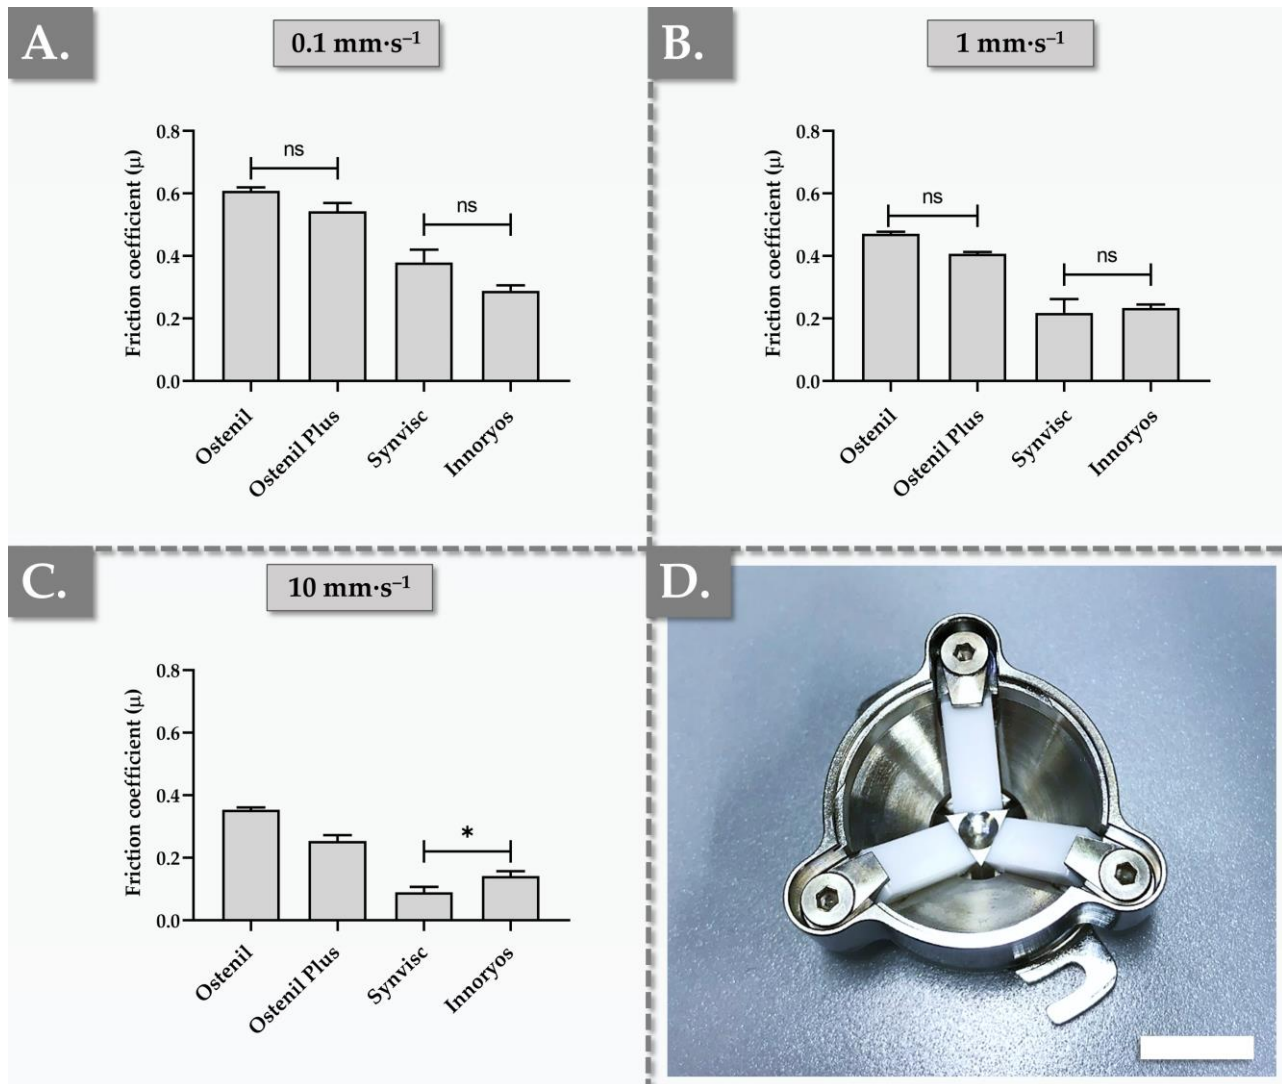

**Figure S2.** Results of in vitro rotational tribology measurements for the four considered commercial hydrogel preparations, using a tribology cell equipped with PDMS plates and a glass ball. The hydrogel samples were not diluted and were analyzed at 37 °C using various rotational sliding velocities. **(A)** Comparative quantitative determination of  $\mu$  friction coefficients within the system under rotation at 0.1 mm·s<sup>-1</sup>. **(B)** Comparative quantitative determination of  $\mu$  friction coefficients within the system under rotation at 1 mm·s<sup>-1</sup>. **(C)** Comparative quantitative determination of  $\mu$  friction coefficients within the system under rotation at 10 mm·s<sup>-1</sup>. **(D)** In vitro rotational tribology setup, showing the lower portion of the tribology cell equipped with three PDMS plates. Scale bar = 10 mm. Measurements were performed in triplicate and standard deviations were reported as error bars around mean values. Statistically non-significant differences ("ns" or  $p$ -value >0.05) were highlighted as appropriate between the experimental groups. Statistically significant differences ("\*" or  $p$ -value <0.05) were highlighted as appropriate between the experimental groups. Non-annotated inter-group differences were all found to be very statistically significant ( $p$ -value <0.01). Detailed results of the statistical analysis are presented in Table S3. ns, non-significant; PDMS, polydimethylsiloxane.

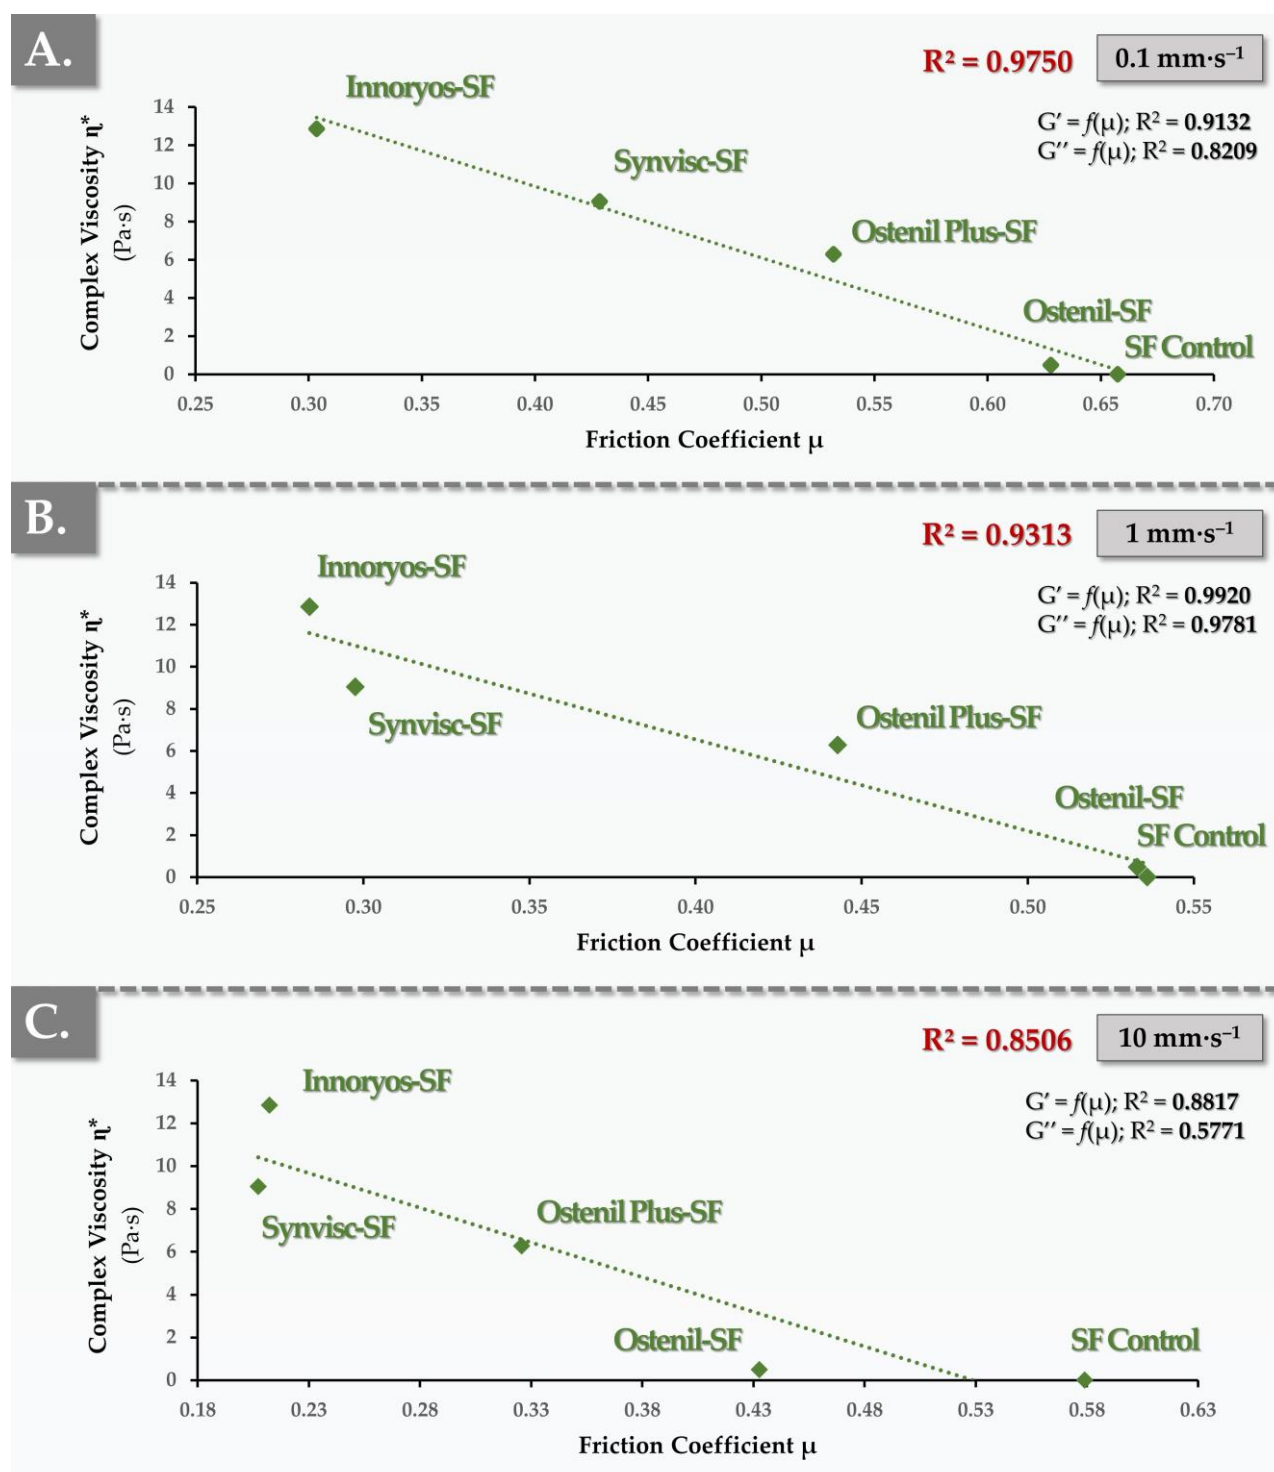

**Figure S3.** Results of the correlation analyses between the rheological and tribological attributes of the investigated hydrogel samples, in relation with the data presented in Figure 1, Figure 2, and Figure S1. **(A)** Correlation of  $\mu$  friction coefficient values of each system (i.e., at low sliding velocity) with the  $\eta^*$  complex viscosity values of the same system. **(B)** Correlation of  $\mu$  friction coefficient values of each system (i.e., at intermediate sliding velocity) with the  $\eta^*$  complex viscosity values of the same system. **(C)** Correlation of  $\mu$  friction coefficient values of each system (i.e., at high sliding velocity) with the  $\eta^*$  complex viscosity values of the same system. For each sliding velocity, the correlations between  $\mu$  values and  $G'$  values or  $G''$  values were determined and reported as the corresponding  $R^2$  correlation coefficients. Pa·s, Pascal seconds; SF, synovial fluid.

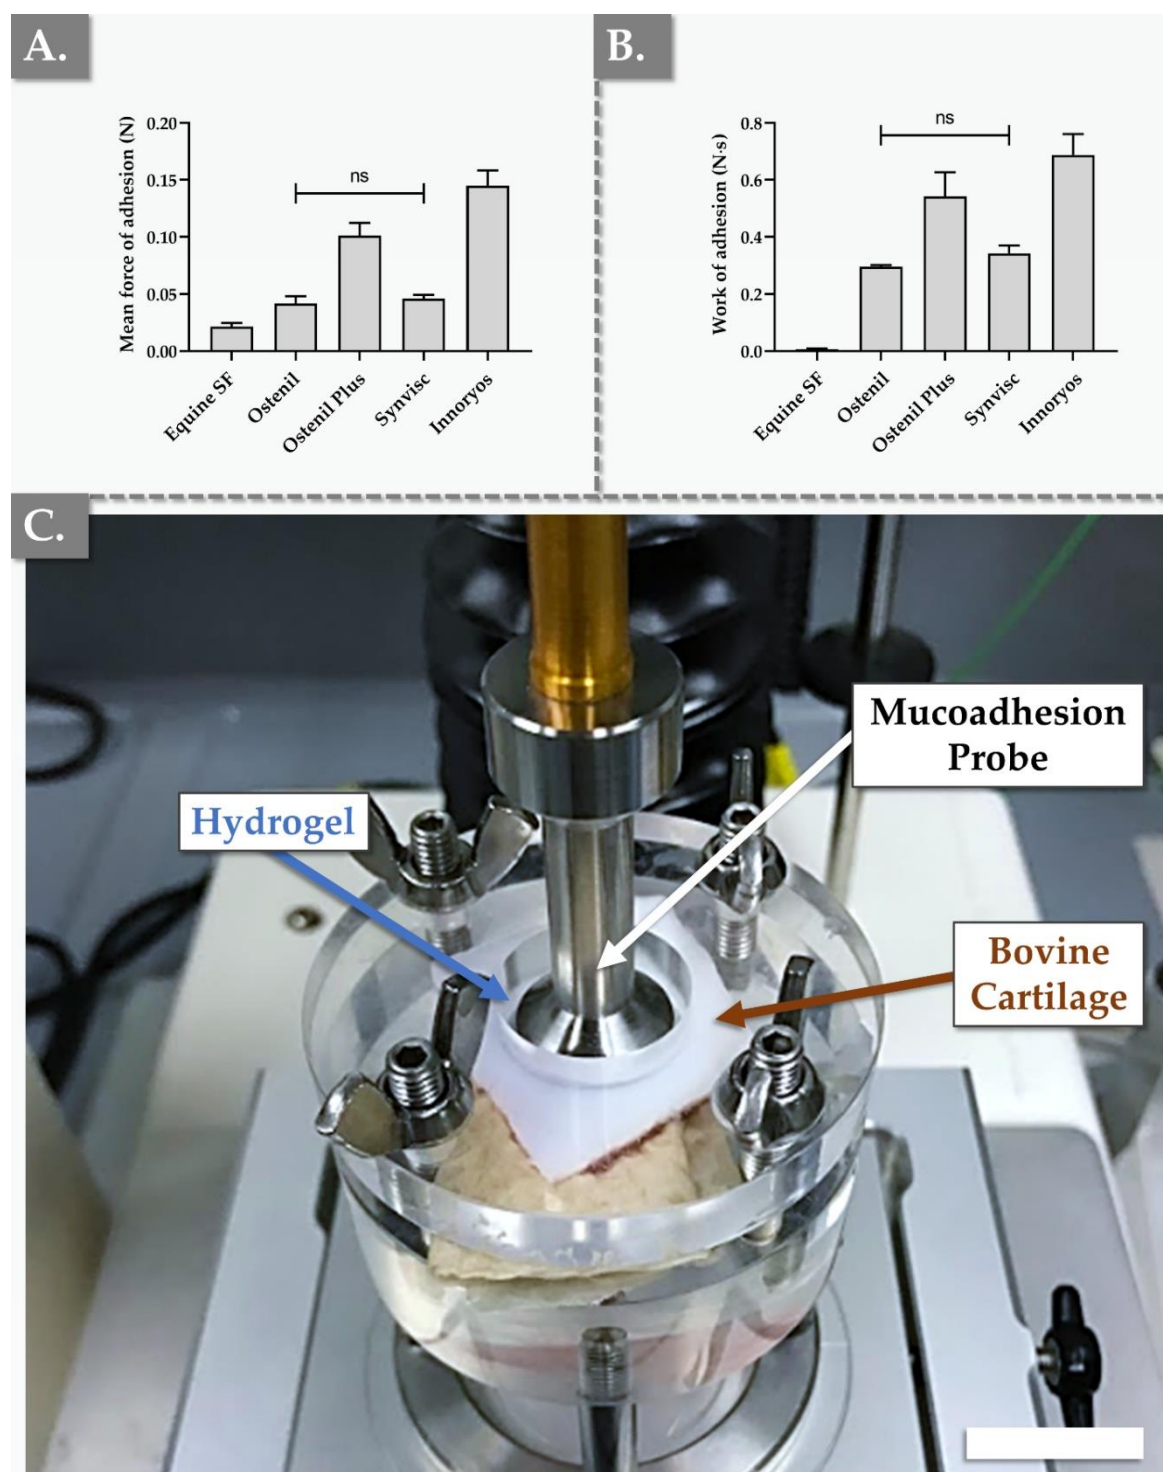

**Figure S4.** Results of ex vivo bio-adhesion measurements for the four considered commercial hydrogel preparations on bovine meniscal cartilage. The undiluted hydrogel samples were analyzed with a constant detachment speed of  $2 \text{ mm}\cdot\text{s}^{-1}$  between a steel mucoadhesion probe and a fresh plane portion of cartilage. **(A)** Comparative quantitative determination of the peak force of adhesion values of the samples. **(B)** Comparative quantitative determination of the work of adhesion values of the samples. **(C)** Illustrative and annotated representation of the experimental ex vivo cartilage bio-adhesion setup. Scale bar = 30 mm. Measurements were performed in triplicate and standard deviations were reported as error bars around mean values. Non-annotated inter-group differences were all found to be very statistically significant ( $p$ -value  $< 0.01$ ). Detailed results of the statistical analysis are presented in Table S5. N, Newtons; N·s, Newton seconds; ns, non-significant; SF, synovial fluid.

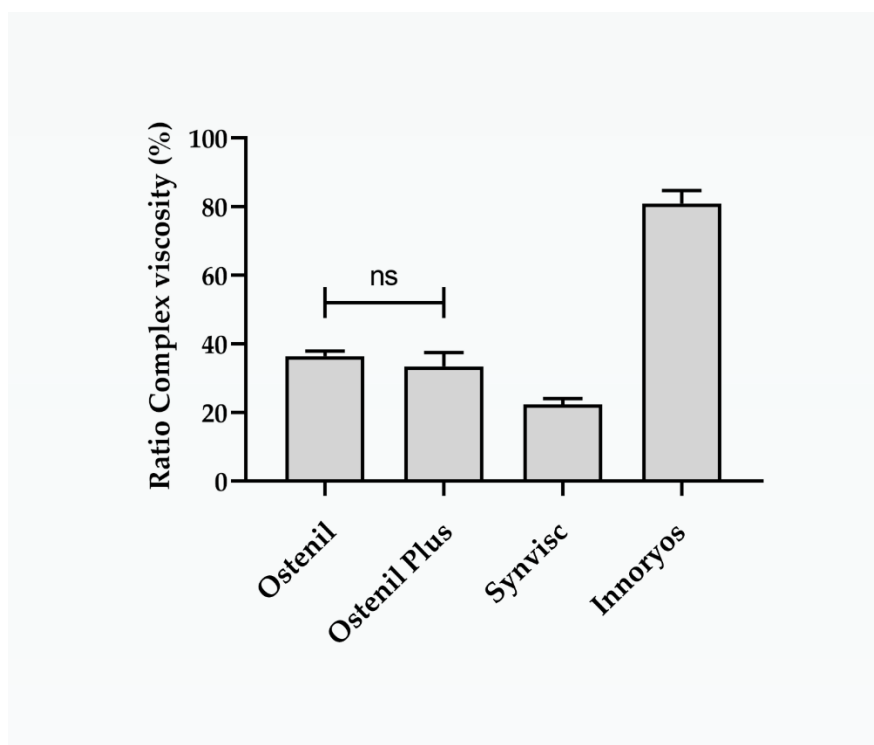

**Figure S5.** Results of accelerated stability studies, expressed as endpoint residual fractions of  $\eta^*$  complex viscosity values for the four considered commercial hydrogel preparations, in relation with the data presented in Figure 4. The samples were prepared by exposure of the hydrogel to  $\text{H}_2\text{O}_2$  for 30 min and were analyzed at 37 °C with a frequency of 0.5 Hz. Measurements were performed in triplicate and standard deviations were reported as error bars around mean values. Statistically non-significant differences (“ns” or  $p$ -value  $>0.05$ ) were highlighted as appropriate between the experimental groups. Non-annotated inter-group differences were all found to be very statistically significant ( $p$ -value  $<0.01$ ). Detailed results of the statistical analysis are presented in Table S6. min, minute; ns, non-significant.

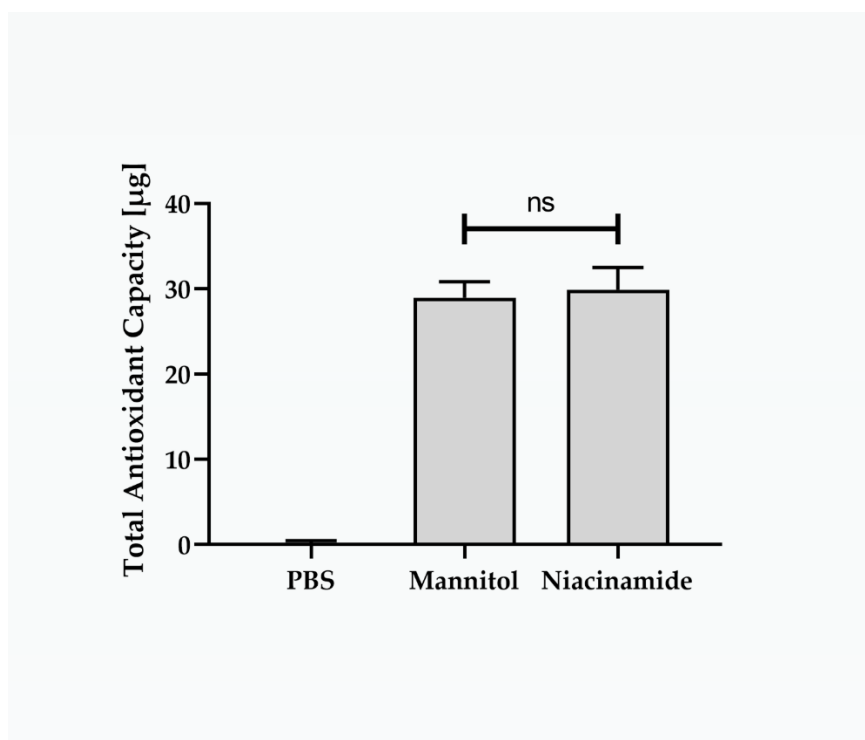

**Figure S6.** Experimental results of comparative intrinsic antioxidant capacity determination assays for mannitol and niacinamide. The results were expressed as the total equivalent antioxidant activity (i.e., equivalent  $\mu\text{g}$  of Trolox) of the samples, based on an experimental Trolox standard curve. Both excipients were characterized by antioxidant activity values which were significantly different from that of the PBS control group. Standard deviations were reported as error bars around mean values. Statistically non-significant differences (“ns” or  $p$ -value  $>0.05$ ) were highlighted as appropriate between the experimental groups. Detailed results of the statistical analysis are presented in Table S7. ns, non-significant; PBS, phosphate-buffered saline.

## 2. Supplementary Tables

**Table S1.** Quantitative results of the post hoc Tukey's multiple comparison test, in relation with the comparative rheological data presented in Figure 1 (i.e.,  $G'$  storage moduli and  $G''$  loss moduli) and in Figure S1 (i.e.,  $\eta^*$  complex viscosity). Non-significant differences corresponded to a  $p$ -value  $> 0.05$ . ns, non-significant; Pa, Pascals; Pa·s, Pascal seconds; SF, synovial fluid.

| Rheological Parameters            | Compared Groups               | Mean Absolute Difference (Pa or Pa·s) | Adjusted $p$ -Value | Significance Level <sup>1</sup> |
|-----------------------------------|-------------------------------|---------------------------------------|---------------------|---------------------------------|
| $G'$ Storage Modulus (Pa)         | SF control / Ostenil-SF       | −0.41                                 | 0.0299              | *                               |
|                                   | SF control / Ostenil Plus-SF  | −12.52                                | $< 0.0001$          | ****                            |
|                                   | SF control / Synvisc-SF       | −26.79                                | $< 0.0001$          | ****                            |
|                                   | SF control / Innoryos-SF      | −27.52                                | $< 0.0001$          | ****                            |
|                                   | Ostenil-SF / Ostenil Plus-SF  | −12.11                                | $< 0.0001$          | ****                            |
|                                   | Ostenil-SF / Synvisc-SF       | −26.39                                | $< 0.0001$          | ****                            |
|                                   | Ostenil-SF / Innoryos-SF      | −27.12                                | $< 0.0001$          | ****                            |
|                                   | Ostenil Plus-SF / Synvisc-SF  | −14.27                                | $< 0.0001$          | ****                            |
|                                   | Ostenil Plus-SF / Innoryos-SF | −15.00                                | $< 0.0001$          | ****                            |
|                                   | Innoryos-SF / Synvisc-SF      | 0.73                                  | 0.0002              | ***                             |
| $G''$ Loss Modulus (Pa)           | SF control / Ostenil-SF       | −1.45                                 | $< 0.0001$          | ****                            |
|                                   | SF control / Ostenil Plus-SF  | −15.23                                | $< 0.0001$          | ****                            |
|                                   | SF control / Synvisc-SF       | −9.43                                 | $< 0.0001$          | ****                            |
|                                   | SF control / Innoryos-SF      | −29.49                                | $< 0.0001$          | ****                            |
|                                   | Ostenil-SF / Ostenil Plus-SF  | −13.78                                | $< 0.0001$          | ****                            |
|                                   | Ostenil-SF / Synvisc-SF       | −7.98                                 | $< 0.0001$          | ****                            |
|                                   | Ostenil-SF / Innoryos-SF      | −28.04                                | $< 0.0001$          | ****                            |
|                                   | Ostenil Plus-SF / Synvisc-SF  | 5.80                                  | $< 0.0001$          | ****                            |
|                                   | Ostenil Plus-SF / Innoryos-SF | −14.26                                | $< 0.0001$          | ****                            |
|                                   | Innoryos-SF / Synvisc-SF      | 20.07                                 | $< 0.0001$          | ****                            |
| $\eta^*$ Complex Viscosity (Pa·s) | SF control / Ostenil-SF       | −0.48                                 | $< 0.0001$          | ****                            |
|                                   | SF control / Ostenil Plus-SF  | −6.28                                 | $< 0.0001$          | ****                            |
|                                   | SF control / Synvisc-SF       | −9.04                                 | $< 0.0001$          | ****                            |
|                                   | SF control / Innoryos-SF      | −12.84                                | $< 0.0001$          | ****                            |
|                                   | Ostenil-SF / Ostenil Plus-SF  | −5.80                                 | $< 0.0001$          | ****                            |
|                                   | Ostenil-SF / Synvisc-SF       | −8.56                                 | $< 0.0001$          | ****                            |
|                                   | Ostenil-SF / Innoryos-SF      | −12.36                                | $< 0.0001$          | ****                            |
|                                   | Ostenil Plus-SF / Synvisc-SF  | −2.76                                 | $< 0.0001$          | ****                            |
|                                   | Ostenil Plus-SF / Innoryos-SF | −6.57                                 | $< 0.0001$          | ****                            |
|                                   | Innoryos-SF / Synvisc-SF      | 3.80                                  | $< 0.0001$          | ****                            |

<sup>1</sup> A significance level described by one asterisk "\*" corresponded to a  $p$ -value between 0.01 and 0.05. A significance level described by three asterisks "\*\*\*\*" corresponded to a  $p$ -value between 0.0001 and 0.001. A significance level described by four asterisks "\*\*\*\*\*" corresponded to a  $p$ -value inferior to 0.0001.

**Table S2.** Quantitative results of the post hoc Tukey's multiple comparison test, in relation with the comparative tribological data presented in Figure 2 (i.e., ex vivo tribology setup). Non-significant ("ns") differences corresponded to a  $p$ -value  $> 0.05$ . ns, non-significant; SF, synovial fluid.

| Rotational Speed Settings                                | Compared Groups               | Mean Absolute Difference in $\mu$ Friction Coefficient | Adjusted $p$ -Value | Significance Level <sup>1</sup> |
|----------------------------------------------------------|-------------------------------|--------------------------------------------------------|---------------------|---------------------------------|
| Low Sliding Velocity<br>(0.1 mm·s <sup>-1</sup> )        | SF control / Ostenil-SF       | 0.03                                                   | 0.8985              | ns                              |
|                                                          | SF control / Ostenil Plus-SF  | 0.13                                                   | 0.0140              | *                               |
|                                                          | SF control / Synvisc-SF       | 0.23                                                   | $< 0.0001$          | ****                            |
|                                                          | SF control / Innoryos-SF      | 0.35                                                   | $< 0.0001$          | ****                            |
|                                                          | Ostenil-SF / Ostenil Plus-SF  | 0.10                                                   | 0.0745              | ns                              |
|                                                          | Ostenil-SF / Synvisc-SF       | 0.20                                                   | 0.0002              | ***                             |
|                                                          | Ostenil-SF / Innoryos-SF      | 0.32                                                   | $< 0.0001$          | ****                            |
|                                                          | Ostenil Plus-SF / Synvisc-SF  | 0.10                                                   | 0.0501              | ns                              |
|                                                          | Ostenil Plus-SF / Innoryos-SF | 0.23                                                   | $< 0.0001$          | ****                            |
|                                                          | Innoryos-SF / Synvisc-SF      | −0.13                                                  | 0.0145              | *                               |
| Intermediate Sliding Velocity<br>(1 mm·s <sup>-1</sup> ) | SF control / Ostenil-SF       | 0.01                                                   | $> 0.9999$          | ns                              |
|                                                          | SF control / Ostenil Plus-SF  | 0.09                                                   | 0.1003              | ns                              |
|                                                          | SF control / Synvisc-SF       | 0.24                                                   | $< 0.0001$          | ****                            |
|                                                          | SF control / Innoryos-SF      | 0.25                                                   | $< 0.0001$          | ****                            |
|                                                          | Ostenil-SF / Ostenil Plus-SF  | 0.09                                                   | 0.1168              | ns                              |
|                                                          | Ostenil-SF / Synvisc-SF       | 0.24                                                   | $< 0.0001$          | ****                            |
|                                                          | Ostenil-SF / Innoryos-SF      | 0.25                                                   | $< 0.0001$          | ****                            |
|                                                          | Ostenil Plus-SF / Synvisc-SF  | 0.15                                                   | 0.0057              | **                              |
|                                                          | Ostenil Plus-SF / Innoryos-SF | 0.16                                                   | 0.0027              | **                              |
|                                                          | Innoryos-SF / Synvisc-SF      | −0.01                                                  | 0.9940              | ns                              |
| High Sliding Velocity<br>(10 mm·s <sup>-1</sup> )        | SF control / Ostenil-SF       | 0.15                                                   | 0.0001              | ***                             |
|                                                          | SF control / Ostenil Plus-SF  | 0.25                                                   | $< 0.0001$          | ****                            |
|                                                          | SF control / Synvisc-SF       | 0.37                                                   | $< 0.0001$          | ****                            |
|                                                          | SF control / Innoryos-SF      | 0.37                                                   | $< 0.0001$          | ****                            |
|                                                          | Ostenil-SF / Ostenil Plus-SF  | 0.11                                                   | 0.0026              | **                              |
|                                                          | Ostenil-SF / Synvisc-SF       | 0.23                                                   | $< 0.0001$          | ****                            |
|                                                          | Ostenil-SF / Innoryos-SF      | 0.22                                                   | $< 0.0001$          | ****                            |
|                                                          | Ostenil Plus-SF / Synvisc-SF  | 0.12                                                   | 0.0010              | **                              |
|                                                          | Ostenil Plus-SF / Innoryos-SF | 0.11                                                   | 0.0015              | **                              |
|                                                          | Innoryos-SF / Synvisc-SF      | 0.01                                                   | 0.9995              | ns                              |

<sup>1</sup> A significance level described by one asterisk "\*" corresponded to a  $p$ -value between 0.01 and 0.05. A significance level described by two asterisks "\*\*" corresponded to a  $p$ -value between 0.001 and 0.01. A significance level described by three asterisks "\*\*\*" corresponded to a  $p$ -value between 0.0001 and 0.001. A significance level described by four asterisks "\*\*\*\*" corresponded to a  $p$ -value inferior to 0.0001.



**Table S3.** Quantitative results of the post hoc Tukey's multiple comparison test, in relation with the comparative tribological data presented in Figure S2 (i.e., in vitro tribology setup). Non-significant ("ns") differences corresponded to a  $p$ -value  $> 0.05$ . ns, non-significant; SF, synovial fluid.

| Rotational Speed Settings                                | Compared Groups           | Mean Absolute Difference in $\mu$ Friction Coefficient | Adjusted $p$ -Value | Significance Level <sup>1</sup> |
|----------------------------------------------------------|---------------------------|--------------------------------------------------------|---------------------|---------------------------------|
| Low Sliding Velocity<br>(0.1 mm·s <sup>-1</sup> )        | SF control / Ostenil      | 0.0490                                                 | 0.6284              | ns                              |
|                                                          | SF control / Ostenil Plus | 0.1147                                                 | 0.0326              | *                               |
|                                                          | SF control / Synvisc      | 0.2781                                                 | $< 0.0001$          | ****                            |
|                                                          | SF control / Innoryos     | 0.3682                                                 | $< 0.0001$          | ****                            |
|                                                          | Ostenil / Ostenil Plus    | 0.0658                                                 | 0.3581              | ns                              |
|                                                          | Ostenil / Synvisc         | 0.2292                                                 | $< 0.0001$          | ****                            |
|                                                          | Ostenil / Innoryos        | 0.3193                                                 | $< 0.0001$          | ****                            |
|                                                          | Ostenil Plus / Synvisc    | 0.1634                                                 | 0.0022              | **                              |
|                                                          | Ostenil Plus / Innoryos   | 0.2535                                                 | $< 0.0001$          | ****                            |
|                                                          | Innoryos / Synvisc        | -0.0901                                                | 0.1200              | ns                              |
| Intermediate Sliding Velocity<br>(1 mm·s <sup>-1</sup> ) | SF control / Ostenil      | 0.0646                                                 | 0.2534              | ns                              |
|                                                          | SF control / Ostenil Plus | 0.1291                                                 | 0.0050              | **                              |
|                                                          | SF control / Synvisc      | 0.3175                                                 | $< 0.0001$          | ****                            |
|                                                          | SF control / Innoryos     | 0.3019                                                 | $< 0.0001$          | ****                            |
|                                                          | Ostenil / Ostenil Plus    | 0.0645                                                 | 0.2548              | ns                              |
|                                                          | Ostenil / Synvisc         | 0.2529                                                 | $< 0.0001$          | ****                            |
|                                                          | Ostenil / Innoryos        | 0.2373                                                 | $< 0.0001$          | ****                            |
|                                                          | Ostenil Plus / Synvisc    | 0.1884                                                 | 0.0001              | ***                             |
|                                                          | Ostenil Plus / Innoryos   | 0.1728                                                 | 0.0003              | ***                             |
|                                                          | Innoryos / Synvisc        | 0.0156                                                 | 0.9843              | ns                              |
| High Sliding Velocity<br>(10 mm·s <sup>-1</sup> )        | SF control / Ostenil      | 0.2203                                                 | $< 0.0001$          | ****                            |
|                                                          | SF control / Ostenil Plus | 0.3212                                                 | $< 0.0001$          | ****                            |
|                                                          | SF control / Synvisc      | 0.4839                                                 | $< 0.0001$          | ****                            |
|                                                          | SF control / Innoryos     | 0.4328                                                 | $< 0.0001$          | ****                            |
|                                                          | Ostenil / Ostenil Plus    | 0.1009                                                 | 0.0001              | ***                             |
|                                                          | Ostenil / Synvisc         | 0.2636                                                 | $< 0.0001$          | ****                            |
|                                                          | Ostenil / Innoryos        | 0.2125                                                 | $< 0.0001$          | ****                            |
|                                                          | Ostenil Plus / Synvisc    | 0.1627                                                 | $< 0.0001$          | ****                            |
|                                                          | Ostenil Plus / Innoryos   | 0.1116                                                 | $< 0.0001$          | ****                            |
|                                                          | Innoryos / Synvisc        | 0.0511                                                 | 0.0442              | *                               |

<sup>1</sup> A significance level described by one asterisk "\*" corresponded to a  $p$ -value between 0.01 and 0.05. A significance level described by two asterisks "\*\*" corresponded to a  $p$ -value between 0.001 and 0.01. A significance level described by three asterisks "\*\*\*" corresponded to a  $p$ -value between 0.0001 and 0.001. A significance level described by four asterisks "\*\*\*\*" corresponded to a  $p$ -value inferior to 0.0001.

**Table S4.** Quantitative results of the post hoc Tukey’s multiple comparison test, in relation with the comparative ex vivo bio-adhesion data presented in Figure 3 (i.e., tibial cartilage setup). Non-significant (“ns”) differences corresponded to a  $p$ -value  $> 0.05$ . N, Newtons; N·s, Newton seconds; ns, non-significant; SF, synovial fluid.

| Bio-Adhesion Parameters | Compared Groups           | Mean Absolute Difference (N or N·s) | Adjusted $p$ -Value | Significance Level <sup>1</sup> |
|-------------------------|---------------------------|-------------------------------------|---------------------|---------------------------------|
| Force of Adhesion (N)   | SF control / Ostenil      | −0.10                               | $< 0.0001$          | ****                            |
|                         | SF control / Ostenil Plus | −0.25                               | $< 0.0001$          | ****                            |
|                         | SF control / Synvisc      | −0.22                               | $< 0.0001$          | ****                            |
|                         | SF control / Innoryos     | −0.49                               | $< 0.0001$          | ****                            |
|                         | Ostenil / Ostenil Plus    | −0.15                               | $< 0.0001$          | ****                            |
|                         | Ostenil / Synvisc         | −0.12                               | $< 0.0001$          | ****                            |
|                         | Ostenil / Innoryos        | −0.39                               | $< 0.0001$          | ****                            |
|                         | Ostenil Plus / Synvisc    | 0.03                                | 0.1338              | ns                              |
|                         | Ostenil Plus / Innoryos   | −0.24                               | $< 0.0001$          | ****                            |
|                         | Innoryos / Synvisc        | 0.27                                | $< 0.0001$          | ****                            |
| Work of Adhesion (N·s)  | SF control / Ostenil      | −0.06                               | 0.0038              | **                              |
|                         | SF control / Ostenil Plus | −0.21                               | $< 0.0001$          | ****                            |
|                         | SF control / Synvisc      | −0.16                               | $< 0.0001$          | ****                            |
|                         | SF control / Innoryos     | −0.62                               | $< 0.0001$          | ****                            |
|                         | Ostenil / Ostenil Plus    | −0.15                               | $< 0.0001$          | ****                            |
|                         | Ostenil / Synvisc         | −0.10                               | $< 0.0001$          | ****                            |
|                         | Ostenil / Innoryos        | −0.56                               | $< 0.0001$          | ****                            |
|                         | Ostenil Plus / Synvisc    | 0.05                                | 0.0066              | **                              |
|                         | Ostenil Plus / Innoryos   | −0.41                               | $< 0.0001$          | ****                            |
|                         | Innoryos / Synvisc        | 0.46                                | $< 0.0001$          | ****                            |

<sup>1</sup> A significance level described by two asterisks “\*\*” corresponded to a  $p$ -value between 0.001 and 0.01. A significance level described by four asterisks “\*\*\*\*” corresponded to a  $p$ -value inferior to 0.0001.

**Table S5.** Quantitative results of the post hoc Tukey's multiple comparison test, in relation with the comparative ex vivo bio-adhesion data presented in Figure S4 (i.e., meniscal cartilage setup). Non-significant ("ns") differences corresponded to a  $p$ -value  $> 0.05$ . N, Newtons; N·s, Newton seconds; ns, non-significant; SF, synovial fluid.

| Bio-Adhesion Parameters | Compared Groups           | Mean Absolute Difference (N or N·s) | Adjusted $p$ -Value | Significance Level <sup>1</sup> |
|-------------------------|---------------------------|-------------------------------------|---------------------|---------------------------------|
| Force of Adhesion (N)   | SF control / Ostenil      | −0.0203                             | 0.0891              | ns                              |
|                         | SF control / Ostenil Plus | −0.0797                             | $< 0.0001$          | ****                            |
|                         | SF control / Synvisc      | −0.0245                             | 0.0351              | *                               |
|                         | SF control / Innoryos     | −0.1233                             | $< 0.0001$          | ****                            |
|                         | Ostenil / Ostenil Plus    | −0.0594                             | $< 0.0001$          | ****                            |
|                         | Ostenil / Synvisc         | −0.0042                             | 0.9714              | ns                              |
|                         | Ostenil / Innoryos        | −0.1030                             | $< 0.0001$          | ****                            |
|                         | Ostenil Plus / Synvisc    | 0.0552                              | $< 0.0001$          | ****                            |
|                         | Ostenil Plus / Innoryos   | −0.0437                             | 0.0007              | ***                             |
|                         | Innoryos / Synvisc        | 0.0988                              | $< 0.0001$          | ****                            |
| Work of Adhesion (N·s)  | SF control / Ostenil      | −0.2898                             | 0.0003              | ***                             |
|                         | SF control / Ostenil Plus | −0.5356                             | $< 0.0001$          | ****                            |
|                         | SF control / Synvisc      | −0.3366                             | $< 0.0001$          | ****                            |
|                         | SF control / Innoryos     | −0.6816                             | $< 0.0001$          | ****                            |
|                         | Ostenil / Ostenil Plus    | −0.2458                             | 0.0012              | **                              |
|                         | Ostenil / Synvisc         | −0.0469                             | 0.7965              | ns                              |
|                         | Ostenil / Innoryos        | −0.3918                             | $< 0.0001$          | ****                            |
|                         | Ostenil Plus / Synvisc    | 0.1990                              | 0.0056              | **                              |
|                         | Ostenil Plus / Innoryos   | −0.1459                             | 0.0381              | *                               |
|                         | Innoryos / Synvisc        | 0.3449                              | $< 0.0001$          | ****                            |

<sup>1</sup> A significance level described by two asterisks "\*\*" corresponded to a  $p$ -value between 0.001 and 0.01. A significance level described by four asterisks "\*\*\*\*" corresponded to a  $p$ -value inferior to 0.0001.

**Table S6.** Quantitative results of the post hoc Tukey's multiple comparison test, in relation with the in vitro rheological data presented in Figure 4 (i.e.,  $G'$  storage moduli and  $G''$  loss moduli) and in Figure S5 (i.e.,  $\eta^*$  complex viscosity). Non-significant ("ns") differences corresponded to a  $p$ -value  $> 0.05$ . ns, non-significant; SF, synovial fluid.

| Rheological Parameters                              | Compared Groups         | Mean Absolute Difference (%) | Adjusted $p$ -Value | Significance Level <sup>1</sup> |
|-----------------------------------------------------|-------------------------|------------------------------|---------------------|---------------------------------|
| Residual Fraction of $G'$ Storage Modulus (%)       | Ostenil / Ostenil Plus  | −14.91                       | 0.0012              | **                              |
|                                                     | Ostenil / Synvisc       | −14.31                       | 0.0016              | **                              |
|                                                     | Ostenil / Innoryos      | −65.26                       | $< 0.0001$          | ****                            |
|                                                     | Ostenil Plus / Synvisc  | 0.60                         | 0.9943              | ns                              |
|                                                     | Ostenil Plus / Innoryos | −50.36                       | $< 0.0001$          | ****                            |
|                                                     | Innoryos / Synvisc      | 50.95                        | $< 0.0001$          | ****                            |
| Residual Fraction of $G''$ Loss Modulus (%)         | Ostenil / Ostenil Plus  | −7.87                        | 0.0258              | *                               |
|                                                     | Ostenil / Synvisc       | −14.22                       | 0.0007              | ***                             |
|                                                     | Ostenil / Innoryos      | −54.03                       | $< 0.0001$          | ****                            |
|                                                     | Ostenil Plus / Synvisc  | −6.34                        | 0.0700              | ns                              |
|                                                     | Ostenil Plus / Innoryos | −46.16                       | $< 0.0001$          | ****                            |
|                                                     | Innoryos / Synvisc      | 39.82                        | $< 0.0001$          | ****                            |
| Residual Fraction of $\eta^*$ Complex Viscosity (%) | Ostenil / Ostenil Plus  | 3.02                         | 0.6240              | ns                              |
|                                                     | Ostenil / Synvisc       | 14.08                        | 0.0019              | **                              |
|                                                     | Ostenil / Innoryos      | −44.46                       | $< 0.0001$          | ****                            |
|                                                     | Ostenil Plus / Synvisc  | 11.06                        | 0.0084              | **                              |
|                                                     | Ostenil Plus / Innoryos | −47.49                       | $< 0.0001$          | ****                            |
|                                                     | Innoryos / Synvisc      | 58.55                        | $< 0.0001$          | ****                            |

<sup>1</sup> A significance level described by one asterisk "\*" corresponded to a  $p$ -value between 0.01 and 0.05. A significance level described by two asterisks "\*\*" corresponded to a  $p$ -value between 0.001 and 0.01. A significance level described by three asterisks "\*\*\*" corresponded to a  $p$ -value between 0.0001 and 0.001. A significance level described by four asterisks "\*\*\*\*" corresponded to a  $p$ -value inferior to 0.0001.

**Table S7.** Quantitative results of the post hoc Tukey's multiple comparison test, in relation with the antioxidant activity data presented in Figure S6. Non-significant ("ns") differences corresponded to a  $p$ -value  $> 0.05$ . ns, non-significant; PBS, phosphate-buffered saline.

| Compared Groups        | Mean Absolute Difference<br>( $\mu\text{g}$ Trolox) | Adjusted $p$ -Value | Significance Level <sup>1</sup> |
|------------------------|-----------------------------------------------------|---------------------|---------------------------------|
| PBS / Mannitol         | −28.77                                              | $< 0.0001$          | ****                            |
| PBS / Niacinamide      | −29.71                                              | $< 0.0001$          | ****                            |
| Mannitol / Niacinamide | −0.94                                               | 0.7850              | ns                              |

<sup>1</sup> A significance level described by four asterisks "\*\*\*\*" corresponded to a  $p$ -value inferior to 0.0001.

**Table S8.** Description of HA-based viscosupplementation product parameters and functional attributes with identified relevance within the ad hoc developmental process. It is to note that the specified reference documents and the related technical options are not exhaustively listed, yet the contents of the table constitute a comprehensive overview. ASTM, American Society for Testing and Materials; EP, European Pharmacopoeia; FRAP, ferric reducing antioxidant power; GPC, gel permeation chromatography; HA, hyaluronic acid; HYAL, hyaluronidases; ISO, International Standards Organization; NA, non-applicable; ROS, reactive oxygen species; SEC, size-exclusion chromatography; SF, synovial fluid.

| Product Parameters /<br>Functional<br>Attributes | Appropriate Analytical Methods                                   | Applicable Norms / Standards /<br>Guidelines                                          | Remarks / Technical Options                                               | Level of Importance within<br>the Developmental Process |
|--------------------------------------------------|------------------------------------------------------------------|---------------------------------------------------------------------------------------|---------------------------------------------------------------------------|---------------------------------------------------------|
| Viscosity                                        | Rotational rheology; Viscometry                                  | Pharmacopoeia (e.g., EP chapter 2.2.10); ASTM (e.g., ASTM D445); ISO (e.g., ISO 3219) | ± SF                                                                      | <u>HIGH</u>                                             |
| Storage Modulus                                  | Oscillatory rheology                                             | ASTM (e.g., ASTM D4440-15); ISO (e.g., ISO 3219-2:2021)                               | At a frequency of 0.5 Hz or 2.5 Hz; ± SF                                  | <u>HIGH</u>                                             |
| Loss Modulus                                     | Oscillatory rheology                                             | ASTM (e.g., ASTM D4440-15); ISO (e.g., ISO 3219-2:2021)                               | At a frequency of 0.5 Hz or 2.5 Hz; ± SF                                  | <u>MODERATE</u>                                         |
| Complex Viscosity                                | Oscillatory rheology                                             | ASTM (e.g., ASTM D4440-15); ISO (e.g., ISO 3219-2:2021)                               | At a frequency of 0.5 Hz or 2.5 Hz; ± SF                                  | <u>HIGH</u>                                             |
| Coefficient of Friction                          | Tribology; Atomic force microscopy                               | ASTM (e.g., ASTM G99-17)                                                              | ± cartilage explant; ± SF                                                 | <u>HIGH</u>                                             |
| Cohesivity                                       | Drop weight method; Five-point grading scale; Spreadability test | NA                                                                                    | Qualitative & quantitative methods available; Use of 2 methods is advised | <u>LOW</u>                                              |

|                            |                                                                                                                         |                                                   |                                                                                                                                                     |                 |
|----------------------------|-------------------------------------------------------------------------------------------------------------------------|---------------------------------------------------|-----------------------------------------------------------------------------------------------------------------------------------------------------|-----------------|
| Injectability              | Injection force measurement;<br>Syringeability                                                                          | ISO (e.g., ISO 11608)                             | With appropriate syringe;<br>Influence of the needle gauge & length                                                                                 | <u>LOW</u>      |
| (Bio)-Adhesion             | Probe tack test; Peeling test; Rolling test                                                                             | ASTM (e.g., ASTM D2979;<br>ASTM F2255-05)         | ± cartilage explant                                                                                                                                 | <u>MODERATE</u> |
| Antioxidant Capacity       | DPPH assay; Trolox assay; FRAP assay;<br>Total phenolic content; Cell-based<br>antioxidant assay                        | ISO (e.g., ISO 14502-1:2005)                      | Use of 2 orthogonal methods is advised;<br>Assay types include<br>spectrophotometric, electrochemical &<br>chromatography techniques                | <u>MODERATE</u> |
| Resistance to HYAL         | HYAL challenge test with various<br>readouts (e.g., rheology, tribology,<br>colorimetry, gravimetry, SEC, GPC)          | NA                                                | Choice of appropriate hyaluronidase<br>source is important;<br>Assay duration depends on enzyme<br>concentrations                                   | <u>HIGH</u>     |
| Resistance to ROS          | ROS challenge test with various readouts<br>(e.g., rheology, tribology, colorimetry,<br>gravimetry, SEC, GPC)           | NA                                                | Choice of appropriate oxidant source<br>(e.g., H <sub>2</sub> O <sub>2</sub> ) is important;<br>Assay duration depends on oxidant<br>concentrations | <u>HIGH</u>     |
| Resistance Against<br>Wear | Tribology (e.g., pin on disc test, Fretting<br>Wear Test) & evaluation with gravimetry,<br>size analysis, or microscopy | ASTM (e.g., ASTM G99);<br>ISO (e.g., ISO 14243-1) | ± cartilage explant                                                                                                                                 | <u>HIGH</u>     |
| Swelling Ratio             | Gravimetry                                                                                                              | NA                                                | Choice of water or physiological<br>solution as swelling medium                                                                                     | <u>LOW</u>      |
